# Supplementary material for: Individual patient data network meta-analysis of mortality effects of implantable cardiac devices
Source: HighWire-hosted journal article supplement (doi:10.1136/heartjnl-2015-307634), 2015-08-12
Supplement: heartjnl-2015-307634supp.pdf [file heartjnl-2015-307634supp.pdf]

## Supplementary data

### Systematic review and distinct trial designs

A systematic review was carried out to identify relevant data. Searches were carried out in Medline and Medline in process (Ovid SP, from 1948 to present), Embase (Ovid SP, from 1988 to present) and the Cochrane Central Register of Controlled Trials (CENTRAL) and were run from 1990 to 27<sup>th</sup> June 2011 (28<sup>th</sup> June for CENTRAL). Abstracts were screened by two reviewers. Reference lists of included trials were also reviewed. Search strategies and the Preferred Reporting Items for Systematic Reviews and Meta-Analyses (PRISMA) diagram are provided at the end of this document.

Twenty-two trials were included in the review. Characteristics of the trials are provided as Table S1, along with references to the associated publications. These data were extracted from the trial publications identified by the systematic review. Missing data may therefore reflect incomplete reporting rather than the actual data collected. Missing data for the individual patient database is recorded in Table 1 of the main text.

There is variation in patient characteristics across trials with respect to age, gender, New York Heart Association (NYHA) class, QRS duration, left bundle branch block (LBBB) morphology and the proportion of patients with disease of ischaemic aetiology. Less difference was seen with respect to mean left ventricular ejection fraction (LVEF) (21-27% across all trials). These differences in average patient characteristics reflect differences in the trial inclusion criteria. However, the differences in average characteristics should not obscure the real similarities across subgroups of the trials. For example, four of the five largest trials (Companion, Multicenter Automatic Defibrillator Implantation Trial II (MADIT II), Resynchronisation-defibrillation for Ambulatory heart Failure Trial (RAFT), and Sudden Cardiac Death in Heart Failure Trial (SCD-HeFT)) all contained some proportion of patients with NYHA III, QRS duration  $\geq 120$ ms and LVEF  $\leq 30\%$ . Study quality was assessed using the risk of bias assessment tool recommended by the National Institute for Health and Care Excellence[1], and is summarised in Table S2.

Of the eight studies not included in the individual patient data set, two were not sponsored by the manufacturers (Cat and Piccirillo *et al.*); two were not available (Amiovirt, Pinter *et al.*); two data sets could not be reconciled with the published data and were therefore not considered of sufficient quality

for inclusion in the analysis (MULTIsite STImulation in Cardiomyopathies (MUSTIC); Resynchronisation for HemodyNamic Treatment for Health failure Management ICD (RHYTHM-ICD)) and two were not identified by the systematic review until data requests had been sent out and the analysis had started (Vector; Respond).

The dataset holder for MUSTIC (Medtronic) was unable to reconcile the available datasets (which were locked over 10 years ago) with the data in the public domain. These data were therefore not supplied to the authors for analysis. The data for RHYTHM-ICD were released to the authors however the authors in collaboration with the data holder (St. Jude Medical) were unable to reconcile the number of deaths between the FDA report for this study (9 deaths for CRT-D and 3 for ICD) with the individual patient data sets (which showed 7 and 2 deaths respectively). Given these concerns regarding the individual patient data this data was not included in the adjusted analysis. The unadjusted analysis was however run with and without data from the studies for which individual patient data were unavailable in order to assess the potential for omission of these studies to influence the study results.

Contak-CD and REsynchronization reVERses Remodeling in Systolic left vEntricular dysfunction (REVERSE) were not straightforward parallel-group designs comparing the devices of interest. Patient allocation in REVERSE was to either CRT-D or CRT-P implantation based on clinical guidelines or physician judgement. Patients were then randomised to resynchronisation therapy “on” or “off”. In addition, patients were programmed to have CRT switched “on” after 12 months in the US and 24 months in Europe. REVERSE is, therefore, considered as four trials: US and European trials in CRT-D implanted patients comparing CRT-D to ICD (representing the majority of patients); and US and European trials in CRT-P implanted patients comparing CRT-P to medical therapy.

Contak-CD initially randomised patients to CRT-P or medical therapy with cross-over to the other therapy after 3 months. Part way through the trial, patients enrolled into a six-month parallel group trial. These designs can, therefore, be considered as two separate trials (Contak-CD Ph1 (up to 3 months) and Contak-CD Ph2, respectively).

The SCD-HeFT trial randomised patients to three arms: conventional therapy plus placebo; conventional therapy plus amiodarone and conventional therapy plus ICD. As the focus of this

analysis was to compare device therapies this posed the question of whether one or both of the non-device arms should be included in the analysis. Based on clinical advice and the all-cause mortality endpoint results from this study (amiodarone vs. placebo hazard ratio 1.06 (95% CI 0.86-1.30)), the amiodarone and placebo arms of this trial were pooled in the analysis.

Miracle ICD and Miracle ICD II, although reported in separate publications, actually describe a single trial so this is considered as a single trial in the analysis.

Data from publications were extracted by one reviewer and checked by another. Individual patient data were requested in a standardised format from the three device manufacturers. A wide range of patient characteristic, study characteristic and outcome data were extracted from the trials. However, the focus of the network meta-analysis is the all-cause mortality outcome.

## Statistical methods

### *Methods for combining binary and hazard ratio data*

Binary data were included using a binomial likelihood for the cumulative probability of death in arm  $k$  of study  $s$  ( $F_{s,k}$ ). From this, the log-cumulative hazard  $\ln(H_{s,k})$  is derived using a complementary log-log link transformation [2]. The log-cumulative hazard is estimated as the sum of a study-specific ‘baseline’ term  $\alpha_s$  and a treatment effect coefficient  $\beta_k$  where  $\beta_1 = 0$  and  $\beta_b$  represents the treatment effect for the baseline treatment in study  $s$ .

$$\ln(H_{s,k}) = \alpha_s + \beta_k - \beta_b$$

*Equation 1*

Hazard ratio data were incorporated into the NMA model using a normal likelihood for the log-hazard ratio  $\ln(HR_{s,k,b})$  for study  $s$  comparing treatment  $k$  to treatment  $b$ . These were estimated from each study using a cox proportional hazards model. The log-hazard ratio estimates are then included in a treatment effect model to allow the hazard ratio data to also inform the  $\beta_k$ :

$$\ln(HR_{s,k,b}) = \beta_k - \beta_b$$

*Equation 2*

Equations 1 and 2 are replaced by equations 3 and 4 for the random effects model where  $re_{s,k}$  is the random effect deviation for arm  $k$  of study  $s$  and is assumed to be normally distributed with zero mean and variance  $\sigma^2/2$ , where  $\sigma^2$  is the random effect variance for a treatment comparison.

$$\ln(H_{s,k}) = \alpha_s + \beta_k - \beta_b + re_{s,k} - re_{s,b}$$

*Equation 3*

$$\ln(HR_{s,k,b}) = \beta_k - \beta_b + re_{s,k} - re_{s,b}$$

*Equation 4*

For ease of implementation this model was implemented in Winbugs and is a Bayesian analysis.

Vague priors were used in this analysis. Two sets of initial values were used and convergence was assessed by examining caterpillar plots and Brooks Gelman-Rubin (BGR) statistics [3]. Fixed and random effects models were fitted and the deviance information criteria (DIC) was used to compare

their fit [4]. Autocorrelation was also examined. Fixed effects models were preferred according to the deviation information criterion (DIC) in the unadjusted analysis and are presented in the main text.

### *Methods for adjusted analysis*

The unadjusted model takes the following form:

$$\lambda_{is} = \lambda_s(t) \cdot \exp(\beta_{CRT-P} D_{CRT-P is} + \beta_{CRT-D} D_{CRT-D is} + \beta_{ICD} D_{ICD is})$$

*Equation 5*

Where  $\lambda_{is}$  is the hazard for patient  $i$  in study  $s$ ,  $\lambda_s(t)$  is the baseline hazard function in study  $s$  which will vary over time  $t$ , the  $\beta$ 's are the treatment coefficients expressing the efficacy of the devices vs. medical therapy and the  $D_{DEV is}$  are device dummy variables which take the value 1 if patient  $i$  in study  $s$  was randomised to that device and 0 otherwise. This model is equivalent to Equation 2 where the hazard ratio data from each trial is synthesised.

When device-by-baseline characteristic interaction effects are included the model expands to take the following form:

$$\begin{aligned} \lambda_{is} = \lambda_s(t) \cdot \exp(\beta_X X_{is} + \beta_{CRT-P} D_{CRT-P is} + \beta_{CRT-D} D_{CRT-D is} + \beta_{ICD} D_{ICD is} \\ + \beta_{X.CRT-P} D_{CRT-P is} X_{is} + \beta_{X.CRT-D} D_{CRT-D is} X_{is} + \beta_{X.ICD} D_{ICD is} X_{is}) \end{aligned}$$

*Equation 6*

Where  $X_{is}$  and  $\beta_X$  are the baseline variable (or vector of covariables) and coefficient on the baseline variable respectively and  $\beta_{X.DEV}$  is the coefficient on the device by baseline variable interaction. The  $\beta_X$  are nuisance parameters in this model. This model was fitted using the `coxph` function in the R package *survival*.

Continuous variables were dichotomised to facilitate presentation. A quadratic model was fitted which showed that the efficacy of CRT-P and CRT-D increases broadly linearly between QRS durations of 120ms and 150ms and then levels off after 150ms. This suggests that these categories are reasonable, though they may not fully reflect heterogeneity in response between QRS duration of 120 and 150ms. For age, efficacy of ICD increases and efficacy of CRT-P decreases with age, until a plateau is observed after approximately 60 years. For simplicity, age was therefore converted to a two level variable of  $<60$  and  $\geq 60$  years. Again this may miss some of the heterogeneity in response to therapy in the  $<60$  category.

### ***Multiple imputation methods***

The exploratory analyses used a complete case approach; prior-MI was used as a proxy for ischaemic aetiology when data on ischaemic aetiology was missing. For the final adjusted model, multiple imputation was used to address missing baseline variables. Imputation was carried out in the Amelia package<sup>1</sup>. Five imputed data sets were created. The approach used assumes that the complete (unobserved) data set has a multivariate normal distribution and that data are missing at random. Draws from the estimated complete data multivariate normal distribution are made using a combination of an expectation-maximisation algorithm and bootstrapping.

### ***Individual study results***

Individual study results for studies included in the individual patient dataset are shown in Figure S1. Q tests were conducted to assess the significance of any heterogeneity in the trials and the  $I^2$  statistic was calculated to quantify the degree of heterogeneity.[5] Multiple studies were reported for three of the pairwise comparisons (see Figure S1). The p-values for the Q test were 0.56, 0.10 and 0.48 for CRT-P vs. OMT, ICD vs. OMT and CRT-D vs. ICD respectively. The  $I^2$  statistics for the same comparisons were 0%, 52% and 0% respectively. There is therefore moderate evidence of heterogeneity within the ICD vs. OMT comparison.

### ***Final model***

All coefficients for the final model are presented as Table S3.

Proportional hazards tests were run for all main effects and interaction effects. The Schoenfeld residual-based test suggested by Grambsch and Therneau was used.[6] Tests of the proportional hazards assumption did not suggest that this was violated (global p-value = 0.684), nor did plots of the Schoenfeld residuals suggest time trends.

---

<sup>1</sup> <http://cran.r-project.org/web/packages/Amelia/vignettes/amelia.pdf>

### *Sensitivity analysis*

The patients included in the current analysis are highly heterogeneous and this heterogeneity is expected to result in differences in treatment effects. The adjusted analysis presented aims to reflect this heterogeneity via the inclusion of interactions between the device effects and a series of covariables. These covariables are assumed to have multiplicative and independent impacts on the hazard ratio of each device, however it is possible (and likely) that these relationships do not perfectly hold. A sensitivity analysis was therefore run restricting the main analysis to those patients with  $QRS \geq 120\text{ms}$  and with NYHA II-IV as this group were expected to be more homogeneous with respect to treatment effects. The results are presented as Table S4 and Table S5. The results are very similar with the exception of the main effects of CRT-D, CRT-P and age and the interaction of age with CRT-D and CRT-P effectiveness (Table S4) which are somewhat different although confidence intervals from the two analyses are overlapping. The net impact of these changes to the model coefficients for predictions in specific patient groups is shown in Table S5. This shows that predictions in the majority of patients remain similar with the exception of patients with age  $<60$  years. The sensitivity analysis suggests that these patients experience higher effects of CRT-P and CRT-D. The sensitivity analysis is associated with increased uncertainty as shown by generally wider confidence intervals in Table S3 and S4, this reflects the smaller number of patients analysed.

## Supplemental Tables

Table S1. Baseline characteristics of studies included in systematic review

| Study              | Arm       | N * | Age- mean<br>(SD) | Male-<br>n (%) | NYHA I n (%) |           |           |        | Mean<br>LVEF<br>(SD) | QRS<br>duration<br>(ms)- Mean<br>(SD) | LBBB<br>morphology<br>-n (%) | Ischaemic<br>-n(%) |
|--------------------|-----------|-----|-------------------|----------------|--------------|-----------|-----------|--------|----------------------|---------------------------------------|------------------------------|--------------------|
|                    |           |     |                   |                | I            | II        | III       | IV     |                      |                                       |                              |                    |
| AMIOVIRT<br>[7 8]  | ICD       | 103 | 58 (11)           | 34<br>(67)     | 10 (18)      | 33 (64)   | 8 (16)    | 0      | 22 (10)              | NR                                    | 21 (42)                      | 0                  |
|                    | MT        |     | 60 (12)           | 38<br>(74)     | 7(13)        | 33 (63)   | 12 (24)   | 0      | 23 (8)               | NR                                    | 28 (53)                      | 0                  |
| CARE-HF [9-<br>13] | CRT<br>-P | 813 | 67 (60-73)†       | 304<br>(74)    | 0            | 0         | 386 (94)  | 23 (6) | 25 (21-<br>29)†      | 160 (152-<br>180)†                    | NR                           | 165 (40)           |
|                    | MT        |     | 66 (59-72)†       | 293<br>(73)    | 0            | 0         | 377 (93)  | 27 (7) | 25 (22-<br>29)†      | 160 (152-180)<br>†                    | NR                           | 144 (36)           |
| CAT [14-16]        | ICD       | 104 | 52 (12)           | 43<br>(86)     | 0            | 33 (66.7) | 17 (33.3) | 0      | 24 (6)               | 102 (29)                              | 42 (84.6)                    | NR                 |
|                    | MT        |     | 52 (10)           | 40             | 0            | 35 (64.1) | 19 (35.8) | 0      | 25 (8)               | 114 (29)                              | 44 (81.8)                    | NR                 |



| Study                  | Arm       | N * | Age- mean<br>(SD)      | Male-<br>n (%) | NYHA I n (%) |            |           |         | Mean<br>LVEF<br>(SD) | QRS<br>duration<br>(ms)- Mean<br>(SD) | LBBB<br>morphology<br>-n (%) | Ischaemic<br>-n(%) |
|------------------------|-----------|-----|------------------------|----------------|--------------|------------|-----------|---------|----------------------|---------------------------------------|------------------------------|--------------------|
|                        |           |     |                        |                | I            | II         | III       | IV      |                      |                                       |                              |                    |
| COMPANION<br>N [17-20] | CRT<br>-P | 152 | 67                     | 413<br>(67)    | 0            | 0          | 537 (87)  | 80 (13) | 20.2                 | 160 <sup>2</sup>                      | 426 (69)                     | 333 (54)           |
|                        | CRT<br>-D | 152 | 66                     | 399<br>(67)    | 0            | 0          | 512 (86)  | 83 (14) | 22.2                 | 160 <sup>2</sup>                      | 434 (73)                     | 327 (55)           |
|                        | MT        | 152 | 68                     | 213<br>(69)    | 0            | 0          | 253 (82)  | 55 (18) | 22.2                 | 158 <sup>†</sup>                      | 216 (70)                     | 182 (59)           |
|                        | CRT<br>-D | 152 | 66 (11)                | 208<br>(85)    | 0            | 78 (32)    | 147 (60)  | 20(8)   | 21 (7)               | 160(27)                               | 132 (54)                     | 164 (67)           |
| Contak-CD<br>[21 22]   | ICD       | 490 | 66 (11)                | 203<br>(83)    | 0            | 81 (33)    | 140 (57)  | 25 (10) | 22 (7)               | 156(26)                               | 135 (55)                     | 174 (71)           |
| DEFINITE<br>[23 24]    | ICD       | 458 | 58.4 (20.3-<br>83.9) ‡ | 166<br>(72.5)  | 58 (25.3)    | 124 (54.2) | 47 (20.5) | 0       | 20.9 (7 -<br>35) ‡   | 114.7 ( 78 -<br>196) ‡                | 45 (19.7)                    | 0                  |

| Study                | Arm       | N * | Age- mean<br>(SD)      | Male-<br>n (%) | NYHA I n (%) |            |           |        | Mean<br>LVEF<br>(SD) | QRS<br>duration<br>(ms)- Mean<br>(SD) | LBBB<br>morphology<br>-n (%) | Ischaemic<br>-n(%) |
|----------------------|-----------|-----|------------------------|----------------|--------------|------------|-----------|--------|----------------------|---------------------------------------|------------------------------|--------------------|
|                      |           |     |                        |                | I            | II         | III       | IV     |                      |                                       |                              |                    |
| MADIT [25<br>26]     | MT        | 196 | 58.1 (21.8-<br>78.7) ‡ | 160<br>(69.9)  | 41 (17.9)    | 139 (60.7) | 49 (21.4) | 0      | 21.8 (10<br>- 35) ‡  | 115.5 (79 -<br>192) ‡                 | 45 (19.7)                    | 0                  |
|                      | ICD       |     | 62 (9)                 | 92<br>(97)     | 35 (37)      | 60 (63)    | 0         | 27 (7) | NR                   | 7 (7)                                 | 95 (100)                     |                    |
|                      | MT        |     | 64 (9)                 | 92<br>(91)     | 33 (33)      | 68 (67)    | 0         | 25 (7) | NR                   | 8 (8)                                 | 101 (100)                    |                    |
| MADIT II [27<br>28]  | ICD       | 123 | 64 (10)                | 623<br>(84)    | 260 (35)     | 260 (35)   | 186 (25)  | 37 (5) | 23 (5)               | NR                                    | 141 (19)                     | 742 (100)          |
|                      | MT        | 2   | 65 (10)                | 417<br>(85)    | 191 (39)     | 167 (34)   | 113 (23)  | 20 (4) | 23 (6)               | NR                                    | 88 (18)                      | 490 (100)          |
| MADIT-CRT<br>[29-31] | CRT<br>-D | 182 | 65 (11)                | 814<br>(74.7)  | 152 (14.0)   | 937 (86.0) | 0         | 0      | 24 (5)               | NR                                    | 761 (69.9)                   | 598 (55)           |
|                      | ICD       | 0   | 64 (11)                | 553            | 113 (15.5)   | 618 (84.5) | 0         | 0      | 24 (5)               | NR                                    | 520 (71.3)                   | 401 (55)           |

| Study                   | Arm | N * | Age- mean<br>(SD) | Male-<br>n (%) | NYHA I n (%) |           |               |           | Mean<br>LVEF<br>(SD) | QRS<br>duration<br>(ms)- Mean<br>(SD) | LBBB<br>morphology<br>-n (%) | Ischaemic<br>-n(%) |
|-------------------------|-----|-----|-------------------|----------------|--------------|-----------|---------------|-----------|----------------------|---------------------------------------|------------------------------|--------------------|
|                         |     |     |                   |                | I            | II        | III           | IV        |                      |                                       |                              |                    |
|                         |     |     |                   | (75.6)         |              |           |               |           |                      |                                       |                              |                    |
| MIRACLE<br>[32-34]      | CRT | 453 | 63.9 (10.7)       | 155            | 0            | 0         | 205 (90)      | 23 (10)   | 21.8<br>(6.3)        | 167 (21)                              | NR                           | 114 (50)           |
|                         | -P  |     |                   | (68)           |              |           |               |           |                      |                                       |                              |                    |
|                         | MT  |     | 64.7 (11.2)       | 153<br>(68)    | 0            | 0         | 205 (91)      | 20 (9)    | 21.6<br>(6.2)        | 165 (20)                              | NR                           | 131 (58)           |
| MIRACLE-<br>ICD [35]    | CRT | 369 | 66.6 (11.3)       | 142            | 0            | 0         | 165<br>(88.2) | 22 (11.8) | 24.2<br>(6.5)        | 165 (22)                              | NR                           | 119 (64)           |
|                         | -D  |     |                   | (75.9)         |              |           |               |           |                      |                                       |                              |                    |
|                         | ICD |     | 67.6 (9.2)        | 141<br>(77.5)  | 0            | 0         | 163<br>(89.6) | 19 (10.4) | 23.9<br>(6.0)        | 162 (22)                              | NR                           | 138 (75.8)         |
| MIRACLE-<br>ICD II [36] | CRT | 186 | 63.0 (12.8)       | 75             | 0            | 85 (100)  | 0             | 0         | 24.4<br>(6.6)        | 166 (25)                              | NR                           | 47 (55.3)          |
|                         | -D  |     |                   | (88.2)         |              |           |               |           |                      |                                       |                              |                    |
|                         | ICD |     | 63.1 (12.1)       | 91<br>(90.1)   | 0            | 101 (100) | 0             | 0         | 24.6<br>(6.7)        | 165 (23)                              | NR                           | 59 (58.4)          |

| Study                           | Arm | N * | Age- mean<br>(SD) | Male-<br>n (%) | NYHA I n (%) |            |          |         | Mean<br>LVEF<br>(SD) | QRS<br>duration<br>(ms)- Mean<br>(SD) | LBBB<br>morphology<br>-n (%) | Ischaemic<br>-n(%) |
|---------------------------------|-----|-----|-------------------|----------------|--------------|------------|----------|---------|----------------------|---------------------------------------|------------------------------|--------------------|
|                                 |     |     |                   |                | I            | II         | III      | IV      |                      |                                       |                              |                    |
| MUSTIC [37]                     | CRT | 58  | 64 (11)           | 19             | 0            | 0          | 29 (100) | 0       | 23 (7) §             | 172 (22)                              | 58 (87%)                     | 25 (37%)           |
|                                 | -PI |     |                   | (66)           |              |            |          |         |                      |                                       |                              |                    |
|                                 | MTI |     |                   | 24             |              |            |          |         |                      |                                       |                              |                    |
| Piccirillo <i>et al</i><br>[38] | ICD | 31  | 65 (8)            | 12             | 0            | 0          | 5 (33)   | 10 (67) | 22 (8)               | 159 (8)                               | NR                           | 15 (100)           |
|                                 | CRT |     |                   | 13             |              |            |          |         |                      |                                       |                              |                    |
|                                 | -D  |     |                   | (81)           |              |            |          |         |                      |                                       |                              |                    |
| Pinter <i>et al</i><br>[39]     | CRT | 72  | 66.3 (8.6)        | 28             | NR           | NR         | NR       | NR      | 21.2<br>(7.9)        | NR                                    | NR                           | NR                 |
|                                 | -D  |     |                   | (77.8)         |              |            |          |         |                      |                                       |                              |                    |
|                                 | ICD |     |                   | 29             |              |            |          |         |                      |                                       |                              |                    |
| RAFT [40 41]                    | CRT | 179 | 66.1 (9.3)        | 758            | 0            | 708 (79.2) | 186      | 0       | 22.6                 | 157 (23.6)                            | 652 (72.9)                   | 614 (68.7)         |

| Study              | Arm | N *     | Age- mean<br>(SD) | Male-<br>n (%) | NYHA I n (%) |            |               |               | Mean<br>LVEF<br>(SD) | QRS<br>duration<br>(ms)- Mean<br>(SD) | LBBB<br>morphology<br>-n (%) | Ischaemic<br>-n(%) |
|--------------------|-----|---------|-------------------|----------------|--------------|------------|---------------|---------------|----------------------|---------------------------------------|------------------------------|--------------------|
|                    |     |         |                   |                | I            | II         | III           | IV            |                      |                                       |                              |                    |
| RESPOND<br>[42]    | -D  | 8       |                   | (84.8)         |              |            | (20.8)        | (5.4)         |                      |                                       |                              |                    |
|                    | ICD |         | 66.2 (9.4)        | 732<br>(81.0)  | 0            | 730 (80.8) | 174<br>(19.2) | 22.6<br>(5.1) | 158.3 (24)           | 643 (71.1)                            | 587 (64.9)                   |                    |
|                    | CRT |         | 66.7 (7.86)       | 25<br>(86.2)   | 0            | 0          | 19 (65.5)     | 10 (34.5)     | 22.3<br>(8.42)       | 91.5 (10.6)                           | NR                           | 22 (75.9)          |
|                    | -P  | 60      |                   | 24<br>(77.4)   | 0            | 0          | 26 (83.9)     | 5 (16.1)      | 22.1<br>(10.2)       | 97.8 (12.9)                           | NR                           | 28 (90.3)          |
|                    | MT  |         | 69.3 (10.2)       | 62<br>(12)     | 0            | 0          | 87 (100)      | 0             | 25 (5)               | 107 (12)                              | NR                           | 47 (54)            |
| RETHINQ<br>[43 44] | -D  | 172     |                   | 49<br>(58)     | 0            | 0          | 84 (99)       | 0             | 26 (6)               | 106 (13)                              | NR                           | 43 (51)            |
| ICD                |     | 58 (14) |                   |                |              |            |               |               |                      |                                       |                              |                    |
| REVERSE<br>[45-48] | CRT |         | 62.9 (10.6)       | 327<br>(78)    | 75 (18)      | 344 (82)   | 0             | 0             | 26.8<br>(7.0)        | 153 (21)                              | 470 (77)                     | 236 (56)           |
| -D                 | 610 |         |                   |                |              |            |               |               |                      |                                       |                              |                    |

| Study               | Arm                | N * | Age- mean<br>(SD)      | Male-<br>n (%)         | NYHA I n (%) |          |               |          | Mean<br>LVEF<br>(SD) | QRS<br>duration<br>(ms)- Mean<br>(SD) | LBBB<br>morphology<br>-n (%) | Ischaemic<br>-n(%) |          |
|---------------------|--------------------|-----|------------------------|------------------------|--------------|----------|---------------|----------|----------------------|---------------------------------------|------------------------------|--------------------|----------|
|                     |                    |     |                        |                        | I            | II       | III           | IV       |                      |                                       |                              |                    |          |
| Rhythm-ICD<br>[49]  | ICD                | 178 | 61.8 (11.6)            | 152<br>(80)            | 32 (17)      | 159 (83) | 0             | 0        | 26.4<br>(7.1)        | 154 (24)                              |                              | 97 (51)            |          |
|                     | CRT<br>-D          |     | NR                     | NR                     | 1 (0.8)      | 6 (5.0)  | 104<br>(87.4) | 8 (6.7)  | 25.6<br>(8.3)        | 169 (16)                              | NR                           | NR                 |          |
|                     | ICD                |     | NR                     | NR                     | 2 (3.4)      | 4 (6.8)  | 50 (84.7)     | 3 (5.1)  | 23.3<br>(6.4)        | 167 (15)                              | NR                           | NR                 |          |
| SCD-HeFT<br>[50 51] | ICD                | 252 | 60.1 (51.9-<br>69.2) † | 639<br>(77)            | 0            | 566 (68) | 263 (32)      | 0        | 19.0-<br>30.0) †     | NR                                    | NR                           | 431 (52)           |          |
|                     | Ami<br>odar<br>one |     | 1                      | 60.4 (51.7-<br>68.3) † | 639<br>(76)  | 0        | 601 (71)      | 244 (29) | 0                    | 25 (20.0-<br>30.0) †                  | NR                           | NR                 | 426 (50) |
|                     | Plac               |     |                        | 59.7 (51.2-<br>68.3) † | 655<br>(76)  | 0        | 594 (70)      | 253 (30) | 0                    | 25 (20.0-<br>30.0) †                  | NR                           | NR                 | 453 (53) |

| Study                    | Arm | N * | Age- mean<br>(SD) | Male-<br>n (%) | NYHA I n (%) |          |          |        | Mean<br>LVEF<br>(SD) | QRS<br>duration<br>(ms)- Mean<br>(SD) | LBBB<br>morphology<br>-n (%) | Ischaemic<br>-n(%) |
|--------------------------|-----|-----|-------------------|----------------|--------------|----------|----------|--------|----------------------|---------------------------------------|------------------------------|--------------------|
|                          |     |     |                   |                | I            | II       | III      | IV     |                      |                                       |                              |                    |
| Vector [52] <sup>#</sup> | ebo |     | 67.8) †           | (77)           |              |          |          |        | 30.0) †              |                                       |                              |                    |
|                          | CRT |     |                   | 90             |              |          |          |        |                      |                                       |                              |                    |
|                          | -P  | 106 | 67.1 (9.7)        | (62.5)         | 0            | 42 (29%) | 94 (65%) | 9 (6%) | NR                   | NR                                    | NR                           | NR                 |
|                          | MT  |     |                   |                |              |          |          |        | NR                   | NR                                    | NR                           | NR                 |

\* randomised; †Median (inter quartile range); ‡Mean (range); § data reported for 67 patients at baseline rather than 58 randomised; || group allocation prior to cross-over; <sup>#</sup>baseline characteristics include 38 non-randomised patients in addition to the 106 randomised.

SD=standard deviation; NYHA = New York Heart Association functional class; LVEF = left ventricular ejection fraction; LBBB = left bundle branch block.

Table S2: Assessment of risk of bias of included studies

| Study reference  | Reporting of randomization | Reporting of allocation concealment | Reporting of blind outcome assessment | Reporting of blind treatment assignment/ | Description of pts. baseline characteristics/ group balance | Analysis based on ITT |
|------------------|----------------------------|-------------------------------------|---------------------------------------|------------------------------------------|-------------------------------------------------------------|-----------------------|
| AMIOVIRT         | Unclear                    | Unclear                             | Adequate                              |                                          | Adequate                                                    | Adequate              |
| CARE-HF          | Adequate                   | Adequate                            | Adequate                              |                                          | Adequate                                                    | Adequate              |
| CAT              | Unclear                    | Adequate                            | Unclear                               |                                          | Adequate                                                    | Unclear               |
| COMPANION        | Unclear                    | Unclear                             | Adequate                              |                                          | Adequate                                                    | Adequate              |
| Contak-CD        | Unclear                    | Unclear                             | Unclear                               |                                          | Adequate                                                    | Unclear               |
| DEFINITE         | Unclear                    | Unclear                             | Adequate                              |                                          | Adequate                                                    | Adequate              |
| MADIT            | Unclear                    | Unclear                             | Unclear                               |                                          | Adequate                                                    | Adequate              |
| MADIT-CRT        | Unclear                    | Adequate                            | Adequate                              |                                          | Adequate                                                    | Adequate              |
| MADIT II         | Unclear                    | Adequate                            | Unclear                               |                                          | Adequate                                                    | Adequate              |
| MIRACLE          | Unclear                    | Adequate                            | Adequate                              |                                          | Adequate                                                    | Adequate              |
| MIRACLE-ICD      | Adequate                   | Adequate                            | Adequate                              |                                          | Adequate                                                    | Adequate              |
| MIRACLE-ICD II   | Adequate                   | Adequate                            | Adequate                              |                                          | Adequate                                                    | Adequate              |
| MUSTIC           | Unclear                    | Unclear                             | Inadequate                            |                                          | Adequate                                                    | Adequate              |
| Piccirillo et al | Unclear                    | Unclear                             | Unclear                               |                                          | Adequate                                                    | Unclear               |
| Pinter et al     | Unclear                    | Unclear                             | Adequate                              |                                          | Adequate                                                    | Unclear               |
| RAFT             | Unclear                    | Adequate                            | Adequate                              |                                          | Adequate                                                    | Adequate              |
| RESPOND          | Adequate                   | Adequate                            | Unclear                               |                                          | Adequate                                                    | Adequate              |
| RETHINQ          | Adequate                   | Adequate                            | Adequate                              |                                          | Adequate                                                    | Adequate              |
| REVERSE          | Unclear                    | Unclear                             | Adequate                              |                                          | Adequate                                                    | Adequate              |



---

|            |         |         |          |          |          |
|------------|---------|---------|----------|----------|----------|
| RHYTHM ICD | Unclear | Unclear | Unclear  | unclear  | Unclear  |
| SCD- HeFT  | Unclear | Unclear | Adequate | Adequate | Adequate |
| Vector     | Unclear | Unclear | Unclear  | Unclear  | Unclear  |

---

Table S3. Multivariate adjusted model

| Variable      | Hazard ratio | Lower 95% CI | Upper 95% CI |
|---------------|--------------|--------------|--------------|
| ICD*          | 0.77         | 0.52         | 1.13         |
| CRT-P*        | 0.74         | 0.42         | 1.28         |
| CRT-D*        | 0.55         | 0.35         | 0.86         |
| QRS<120       | 0.73         | 0.59         | 0.91         |
| QRS>=120      | 1.05         | 0.86         | 1.27         |
| LBBB          | 0.85         | 0.70         | 1.03         |
| AGE>=60       | 1.82         | 1.57         | 2.11         |
| GENDER=M      | 1.35         | 1.14         | 1.60         |
| ICD*QRS<120   | 1.08         | 0.78         | 1.49         |
| ICD*QRS>=120  | 0.90         | 0.70         | 1.17         |
| ICD*LBBB      | 1.07         | 0.82         | 1.39         |
| ICD*GENDER=M  | 0.75         | 0.59         | 0.97         |
| ICD*AGE>=60   | 1.23         | 0.98         | 1.55         |
| CRTP*QRS>=120 | 1.17         | 0.83         | 1.65         |
| CRTP*LBBB     | 0.88         | 0.62         | 1.25         |
| CRTP*GENDER=M | 1.24         | 0.86         | 1.77         |
| CRTP*AGE>=60  | 0.86         | 0.62         | 1.21         |
| CRTD*QRS>=120 | 1.13         | 0.87         | 1.48         |
| CRTD*LBBB     | 0.88         | 0.67         | 1.16         |
| CRTD*GENDER=M | 1.16         | 0.84         | 1.58         |
| CRTD*AGE>=60  | 0.98         | 0.74         | 1.28         |

\* Reference category is a patient receiving OMT, <60 years of age, female, QRS duration  $\geq 150$ ms and non-LBBB conduction abnormality. CI = confidence interval.

ICD = implantable cardioverter defibrillator; CRT-P = cardiac resynchronisation therapy pacemaker; CRT-D = cardiac resynchronisation therapy defibrillator; LBBB = left bundle branch block.

Table S4. Multivariate adjusted model – sensitivity analysis excluding patients with QRS<120 or NYHA Class I

| Variable            | Hazard ratio | Lower 95% CI | Upper 95% CI |
|---------------------|--------------|--------------|--------------|
| ICD*                | 0.78         | 0.50         | 1.21         |
| CRT-P*              | 0.66         | 0.37         | 1.18         |
| CRT-D*              | 0.49         | 0.30         | 0.79         |
| QRS $\geq 120$      | 1.08         | 0.89         | 1.31         |
| LBBB                | 0.84         | 0.69         | 1.03         |
| AGE $\geq 60$       | 1.59         | 1.31         | 1.94         |
| GENDER=M            | 1.39         | 1.12         | 1.73         |
| ICD*QRS $\geq 120$  | 0.90         | 0.69         | 1.18         |
| ICD*LBBB            | 1.04         | 0.79         | 1.37         |
| ICD*GENDER=M        | 0.76         | 0.56         | 1.03         |
| ICD*AGE $\geq 60$   | 1.19         | 0.89         | 1.58         |
| CRTP*QRS $\geq 120$ | 1.14         | 0.80         | 1.61         |
| CRTP*LBBB           | 0.92         | 0.64         | 1.31         |
| CRTP*GENDER=M       | 1.20         | 0.82         | 1.76         |
| CRTP*AGE $\geq 60$  | 0.97         | 0.68         | 1.39         |
| CRTD*QRS $\geq 120$ | 1.12         | 0.86         | 1.48         |
| CRTD*LBBB           | 0.89         | 0.67         | 1.18         |
| CRTD*GENDER=M       | 1.11         | 0.79         | 1.56         |
| CRTD*AGE $\geq 60$  | 1.14         | 0.84         | 1.55         |

\* Reference category is a patient receiving OMT, <60 years of age, female, QRS duration  $\geq 150$ ms and non-LBBB conduction abnormality. CI = confidence interval.

ICD = implantable cardioverter defibrillator; CRT-P = cardiac resynchronisation therapy pacemaker; CRT-D = cardiac resynchronisation therapy defibrillator; LBBB = left bundle branch block.

Table S5. Subgroup-specific treatment effects predicted by multivariate adjusted network meta-analysis – sensitivity analysis excluding patients with QRS<120 or NYHA Class I

| Gender                                 | Age | QRS       | LBBB | CRT-D vs. MT     | CRT-P vs. MT     | ICD vs. MT       | CRT-D vs. CRT-P  | CRT-D vs. ICD    | ICD vs. CRT-P    |
|----------------------------------------|-----|-----------|------|------------------|------------------|------------------|------------------|------------------|------------------|
| Hazard ratio (95% confidence interval) |     |           |      |                  |                  |                  |                  |                  |                  |
|                                        |     | <120      | N    |                  |                  |                  |                  |                  |                  |
|                                        |     | ≥120-<150 | N    | 0.55(0.34 ,0.87) | 0.76(0.43 ,1.33) | 0.71(0.47 ,1.07) | 0.72(0.40 ,1.31) | 0.77(0.49 ,1.23) | 0.93(0.53 ,1.65) |
|                                        | <60 | ≥120-<150 | Y    | 0.48(0.31 ,0.76) | 0.69(0.41 ,1.17) | 0.74(0.49 ,1.12) | 0.70(0.40 ,1.21) | 0.66(0.42 ,1.03) | 1.06(0.62 ,1.81) |
|                                        |     | ≥150      | N    | 0.49(0.30 ,0.79) | 0.66(0.37 ,1.18) | 0.78(0.50 ,1.21) | 0.73(0.40 ,1.34) | 0.62(0.39 ,0.99) | 1.18(0.66 ,2.10) |
|                                        |     | ≥150      | Y    | 0.43(0.28 ,0.66) | 0.61(0.38 ,0.97) | 0.81(0.55 ,1.20) | 0.71(0.42 ,1.18) | 0.53(0.35 ,0.80) | 1.34(0.82 ,2.18) |
| Female                                 |     | <120      | N    |                  |                  |                  |                  |                  |                  |
|                                        |     | ≥120-<150 | N    | 0.62(0.41 ,0.95) | 0.73(0.44 ,1.22) | 0.84(0.58 ,1.21) | 0.85(0.50 ,1.44) | 0.74(0.50 ,1.11) | 1.14(0.69 ,1.9)  |
|                                        | ≥60 | ≥120-<150 | Y    | 0.55(0.37 ,0.82) | 0.67(0.43 ,1.06) | 0.88(0.61 ,1.26) | 0.82(0.51 ,1.33) | 0.63(0.43 ,0.92) | 1.30(0.81 ,2.07) |
|                                        |     | ≥150      | N    | 0.56(0.36 ,0.86) | 0.65(0.39 ,1.06) | 0.93(0.63 ,1.38) | 0.86(0.51 ,1.45) | 0.60(0.40 ,0.90) | 1.44(0.87 ,2.38) |
|                                        |     | ≥150      | Y    | 0.49(0.35 ,0.70) | 0.59(0.41 ,0.85) | 0.97(0.70 ,1.34) | 0.83(0.55 ,1.25) | 0.51(0.36 ,0.71) | 1.64(1.10 ,2.43) |
| Male                                   | <60 | <120      | N    |                  |                  |                  |                  |                  |                  |

|     |           |   |                  |                  |                  |                  |                  |                  |
|-----|-----------|---|------------------|------------------|------------------|------------------|------------------|------------------|
|     | ≥120-<150 | N | 0.61(0.42 ,0.87) | 0.91(0.58 ,1.41) | 0.53(0.39 ,0.73) | 0.67(0.42 ,1.06) | 1.13(0.80 ,1.61) | 0.59(0.38 ,0.92) |
|     | ≥120-<150 | Y | 0.54(0.36 ,0.79) | 0.83(0.54 ,1.28) | 0.56(0.39 ,0.80) | 0.65(0.41 ,1.03) | 0.96(0.67 ,1.39) | 0.67(0.43 ,1.06) |
|     | ≥150      | N | 0.54(0.37 ,0.79) | 0.80(0.50 ,1.26) | 0.59(0.42 ,0.84) | 0.68(0.42 ,1.09) | 0.91(0.64 ,1.30) | 0.74(0.46 ,1.19) |
|     | ≥150      | Y | 0.48(0.34 ,0.67) | 0.73(0.50 ,1.06) | 0.62(0.44 ,0.85) | 0.65(0.43 ,0.99) | 0.77(0.56 ,1.07) | 0.84(0.56 ,1.27) |
|     | <120      | N |                  |                  |                  |                  |                  |                  |
|     | ≥120-<150 | N | 0.69(0.52 ,0.92) | 0.88(0.61 ,1.27) | 0.64(0.50 ,0.81) | 0.79(0.54 ,1.15) | 1.09(0.85 ,1.40) | 0.72(0.50 ,1.05) |
| ≥60 | ≥120-<150 | Y | 0.61(0.45 ,0.83) | 0.81(0.56 ,1.16) | 0.66(0.49 ,0.89) | 0.76(0.52 ,1.11) | 0.93(0.71 ,1.21) | 0.82(0.56 ,1.20) |
|     | ≥150      | N | 0.62(0.46 ,0.83) | 0.77(0.54 ,1.11) | 0.70(0.53 ,0.94) | 0.80(0.55 ,1.15) | 0.88(0.67 ,1.14) | 0.91(0.63 ,1.32) |
|     | ≥150      | Y | 0.55(0.43 ,0.70) | 0.71(0.56 ,0.90) | 0.73(0.57 ,0.94) | 0.77(0.58 ,1.02) | 0.74(0.61 ,0.91) | 1.03(0.77 ,1.38) |

---

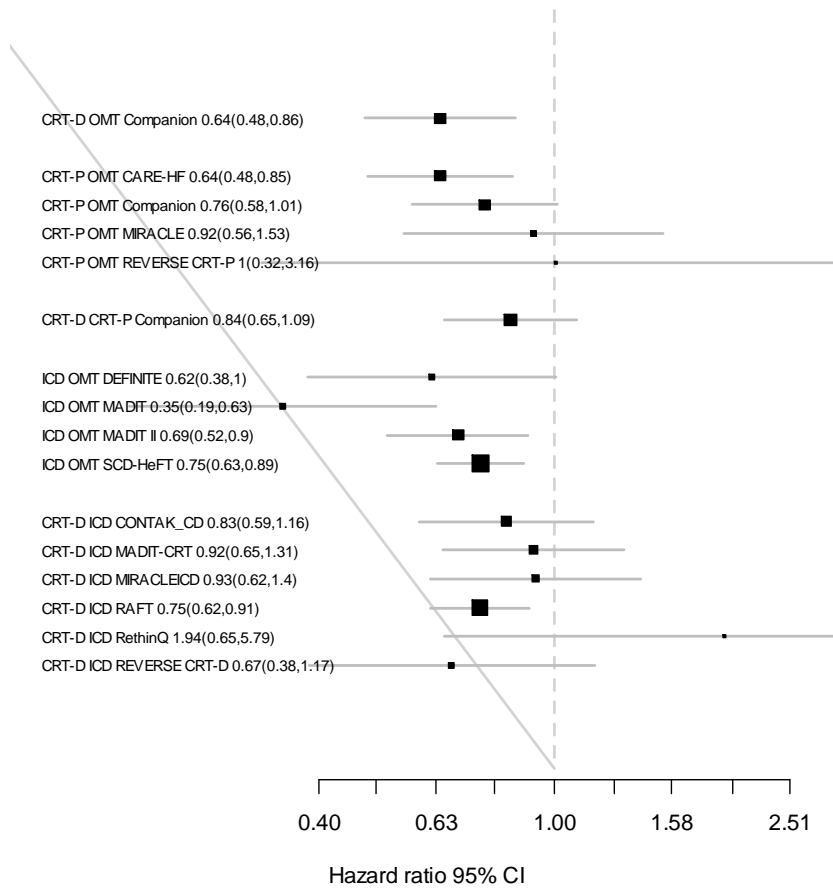

**Figure S1: Hazard ratios on all-cause mortality for individual studies included in individual patient data**

## Further information on searches

### Search syntax

Database: Ovid MEDLINE(R) In-Process & Other Non-Indexed Citations and Ovid MEDLINE(R)

<1948 to Present>

Search run on 27/06/2011

- 1 (CRT or "cardiac resynchron\$ therap\$").tw. (6517)
- 2 resynchron\$ therap\$.tw. (2829)
- 3 BVP.tw. (170)
- 4 Cardiac Resynchronization Therapy/ (228)
- 5 (biventricular adj10 pac\$).tw. (1261)
- 6 (biventricular adj10 stimulat\$).tw. (157)
- 7 ((cardiac or heart) adj10 resynch\$).tw. (3034)
- 8 (coronary adj10 resynch\$).tw. (131)
- 9 (atriobiventricular adj10 pac\$).tw. (14)
- 10 (atrio biventricular adj10 pac\$).tw. (23)
- 11 CRT-P.tw. (133)
- 12 CRT-D.tw. (176)
- 13 cardioversion.tw. (4098)
- 14 cardioverter.tw. (6545)
- 15 Defibrillators, Implantable/ (8786)
- 16 (internal adj3 (defibrillat\$ or cardioverter)).tw. (422)
- 17 (implant adj3 (cardioverter or defibrillat\$)).tw. (122)
- 18 (cardiac adj3 defibrillat\$).tw. (1061)
- 19 ((implant or internal or cardiac) and defib\$).tw. (7618)
- 20 icd.tw. (14797)
- 21 or/1-20 (35301)
- 22 Intraventricular conduction delay\$.tw. (271)
- 23 Dilated cardiomyopathy.tw. (10812)



- 24 (Sudden death adj3 cardiac).tw. (801)
- 25 ((prolonged or wide) adj2 QRS).tw. (1056)
- 26 (Premature ventricular adj1 (complex\$ or contraction)).tw. (794)
- 27 ((Reduced or low) adj ejection fraction).tw. (1045)
- 28 ((impaired or dysfunction or function) adj3 (left ventric\$ or LVEF or LV)).tw. (37111)
- 29 (ventricular adj1 (tachycardia or fibrillation)).tw. (25008)
- 30 arrhythmi\$.tw. (57496)
- 31 heart failure.tw. (85570)
- 32 ((cardiac or ventricular or intraventricular) adj5 asynchron\$).tw. (444)
- 33 ((cardiac or ventricular or intraventricular) adj5 dyssynchron\$).tw. (882)
- 34 cardiac arrest.tw. (16215)
- 35 tachycardia, ventricular/ (8877)
- 36 Arrhythmias, Cardiac/ (47995)
- 37 Heart Failure/ (71586)
- 38 Death, Sudden, Cardiac/ (9017)
- 39 Ventricular Dysfunction, Left/ or Bundle-Branch Block/ (23476)
- 40 Bundle Branch Block.tw. (6055)
- 41 Ventricular Fibrillation/ (13640)
- 42 Heart Arrest/ (19743)
- 43 Myocardial Infarction/ (126739)
- 44 or/22-43 (368895)
- 45 Randomized controlled trials as Topic/ (73673)
- 46 Randomized controlled trial/ (309567)
- 47 Random allocation/ (71762)
- 48 Double blind method/ (110773)
- 49 Single blind method/ (15106)
- 50 Clinical trial/ (463846)
- 51 exp Clinical Trials as Topic/ (242485)

52 clinical trial/ or clinical trial, phase i/ or clinical trial, phase ii/ or clinical trial, phase iii/ or  
clinical trial, phase iv/ or multicenter study/ (558228)  
53 or/45-52 (851498)  
54 randomized controlled trial.pt. (309567)  
55 controlled clinical trial.pt. (82654)  
56 random allocation.sh. (71762)  
57 double blind method.sh. (110773)  
58 single blind method.sh. (15106)  
59 (clin\$ adj25 trial\$).tw. (200910)  
60 ((singl\$ or doubl\$ or tripl\$ or trebl\$) adj25 (blind\$ or mask\$ or dummy\$)).tw. (114910)  
61 Placebos/ (29766)  
62 Placebo\$.tw. (133939)  
63 Random\$.tw. (553900)  
64 or/54-63 (914706)  
65 53 or 64 (1220129)  
66 Case report.tw. (168393)  
67 Letter/ (733158)  
68 Historical article/ (275454)  
69 or/66-68 (1167008)  
70 65 not 69 (1192243)  
71 21 and 44 and 70 (3760)  
72 animals/ not (animals/ and humans/) (3520949)  
73 71 not 72 (3508)  
74 limit 73 to english language (3198)  
75 limit 74 to yr="1990 -Current" (3152)

**Database: Embase<1988 to 2011 Week 25>**

Search run on 27/06/2011

1 (CRT or "cardiac resynchron\$ therap\$").tw. (9071)

- 2 resynchron\$ therap\$.tw. (4112)
- 3 BVP.tw. (178)
- 4 cardiac resynchronization therapy/ (5525)
- 5 (biventricular adj10 pac\$.tw. (1670)
- 6 (biventricular adj10 stimulat\$.tw. (219)
- 7 ((cardiac or heart) adj10 resynch\$.tw. (4377)
- 8 (coronary adj10 resynch\$.tw. (167)
- 9 (atrio biventricular adj10 pac\$.tw. (30)
- 10 (atriobiventricular adj10 pac\$.tw. (20)
- 11 CRT-P.tw. (242)
- 12 CRT-D.tw. (485)
- 13 cardioversion.tw. (4285)
- 14 cardioverter.tw. (7839)
- 15 (internal adj3 (defibrillat\$ or cardioverter)).tw. (442)
- 16 (implant\$ adj3 (cardioverter or defibrillat\$)).tw. (9516)
- 17 (cardiac adj3 defibrillat\$.tw. (1115)
- 18 ((implant or internal or cardiac) and defib\$.tw. (8844)
- 19 icd.tw. (20125)
- 20 \*defibrillator/ (6658)
- 21 or/1-20 (44411)
- 22 \*Heart arrest/ (10051)
- 23 \*myocardial infarction/ (48787)
- 24 \*Death,-Sudden,-Cardiac/ (8275)
- 25 cardiac arrest.tw. (15652)
- 26 Intraventricular conduction delay\$.tw. (280)
- 27 Dilated cardiomyopathy.tw. (12299)
- 28 (sudden death adj3 cardiac).tw. (818)
- 29 ((prolonged or wide) adj2 QRS).tw. (1190)

30 (Premature ventricular adj1 (complex\$ or contraction)).tw. (699)

31 ((Reduced or low) adj ejection fraction).tw. (1302)

32 ((impaired or dysfunction or function) adj3 (left ventric\$ or LVEF or LV)).tw. (39565)

33 (ventricular adj1 (tachycardia or fibrillation)).tw. (22091)

34 arrhythmi\$.tw. (52667)

35 \*congestive cardiomyopathy/ (5894)

36 \*heart muscle conduction system/ (1786)

37 \*heart arrhythmia/ (18228)

38 \*heart bundle branch block/ (712)

39 \*heart failure/ (39054)

40 \*congestive heart failure/ (17950)

41 heart failure.tw. (96051)

42 ((cardiac or ventricular or intraventricular) adj5 asynchron\$).tw. (464)

43 ((cardiac or ventricular or intraventricular) adj5 dyssynchron\$).tw. (1299)

44 \*Bundle-Branch Block/ (712)

45 Bundle Branch Block.tw. (4682)

46 \*heartventricletachycardia/ (8113)

47 \*syncope/ (5496)

48 \*heartventricle fibrillation/ (5098)

49 or/22-48 (273295)

50 Clinical trial/ (758285)

51 Randomized controlled trial/ (265459)

52 Randomization/ (49808)

53 Single blind procedure/ (13620)

54 Double blind procedure/ (90508)

55 Crossover procedure/ (29846)

56 Placebo/ (146356)

57 Rct.tw. (6934)

58 random\*.tw. (588686)

59 (clinical trial\$ or controlled clinical trial\$ or major clinical stud\$ or controlled stud\$.tw.  
(219539)

60 (clinical adj25 trial\$.tw. (213401)

61 ((single\$ or double\$ or treble\$ or triple\$) and (blind\$ or mask\$)).tw. (117874)

62 Placebo\$.tw. (137596)

63 Prospective study/ (157946)

64 or/50-63 (1381558)

65 Case study/ (10159)

66 Abstract report/ or letter/ (611863)

67 or/65-66 (621895)

68 64 not 67 (1352204)

69 21 and 49 and 68 (4664)

70 limit 69 to english language (4204)

71 animal/ not (animal/ and human/) (526120)

72 animal experiment/ (1040422)

73 71 or 72 (1559640)

74 70 not 73 (3995)

75 conference.so. (435795)

76 74 not 75 (3512)

77 limit 76 to yr="1990 -Current" (3499)

**Database: Cochrane**

Search run on: 28/06/2011

|    |                                                                  |     |
|----|------------------------------------------------------------------|-----|
| #1 | (CRT or cardiac resynchron* therap*):ti,ab,kw in Clinical Trials | 647 |
| #2 | (resynchron* therap*):ti,ab,kw in Clinical Trials                | 204 |
| #3 | (BVP):ti,ab,kw in Clinical Trials                                | 14  |

|     |                                                                                                                                      |      |
|-----|--------------------------------------------------------------------------------------------------------------------------------------|------|
| #4  | MeSH descriptor Cardiac Resynchronization Therapy, this term only                                                                    | 4    |
| #5  | (biventricular NEAR pac*):ti,ab,kw in Clinical Trials                                                                                | 108  |
| #6  | (biventricular NEAR stimulat*):ti,ab,kw in Clinical Trials                                                                           | 16   |
| #7  | ((cardiac or heart) NEAR resynch*):ti,ab,kw in Clinical Trials                                                                       | 205  |
| #8  | (coronary NEAR resynch*):ti,ab,kw in Clinical Trials                                                                                 | 3    |
| #9  | (atriobiventricular NEAR pac*):ti,ab,kw in Clinical Trials                                                                           | 3    |
| #10 | (atrio biventricular NEAR pac*):ti,ab,kw in Clinical Trials                                                                          | 11   |
| #11 | (CRT-P):ti,ab,kw in Clinical Trials                                                                                                  | 23   |
| #12 | (CRT -D):ti,ab,kw in Clinical Trials                                                                                                 | 58   |
| #13 | (cardioversion):ti,ab,kw in Clinical Trials                                                                                          | 546  |
| #14 | (cardioverter):ti,ab,kw in Clinical Trials                                                                                           | 470  |
| #15 | MeSH descriptor Defibrillators, Implantable, this term only                                                                          | 734  |
| #16 | (internal NEAR (defibrillat* or cardioverterter)):ti,ab,kw in Clinical Trials                                                        | 19   |
| #17 | (implant NEAR (cardioverter OR defibrillat*)):ti,ab,kw in Clinical Trials                                                            | 119  |
| #18 | (cardiac NEAR defibrillat*):ti,ab,kw in Clinical Trials                                                                              | 283  |
| #19 | ((implant OR internal OR cardiac) AND defib*):ti,ab,kw in Clinical Trials                                                            | 709  |
| #20 | (icd):ti,ab,kw in Clinical Trials                                                                                                    | 780  |
| #21 | (#1 OR #2 OR #3 OR #4 OR #5 OR #6 OR #7 OR #8 OR #9 OR #10 OR #11<br>OR #12 OR #13 OR #14 OR #15 OR #16 OR #17 OR #18 OR #19 OR #20) | 2746 |
| #22 | (intraventricular conduction delay):ti,ab,kw in Clinical Trials                                                                      | 31   |
| #23 | (Dilated cardiomyopathy):ti,ab,kw in Clinical Trials                                                                                 | 551  |
| #24 | (Sudden death NEAR cardiac):ti,ab,kw in Clinical Trials                                                                              | 641  |

|                                                                                                             |      |
|-------------------------------------------------------------------------------------------------------------|------|
| #25 ((prolonged or wide) NEAR QRS):ti,ab,kw in Clinical Trials                                              | 84   |
| #26 (Premature ventricular NEAR (complex* or contraction)):ti,ab,kw in Clinical Trials                      | 415  |
| #27 ((Reduced or low) NEAR ejection fraction):ti,ab,kw in Clinical Trials                                   | 446  |
| #28 ((impaired or dysfunction or function) NEAR ( left ventric* or LVEF or LV)):ti,ab,kw in Clinical Trials | 4865 |
| #29 (ventricular NEAR (tachycardia or fibrillation)):ti,ab,kw in Clinical Trials                            | 1673 |
| #30 (heart failure):ti,ab,kw in Clinical Trials                                                             | 8459 |
| #31 ((cardiac or ventricular or intraventricular) NEAR asynchron*):ti,ab,kw in Clinical Trials              | 25   |
| #32 ((cardiac or ventricular or intraventricular) NEAR dyssynchron*):ti,ab,kw in Clinical Trials            | 56   |
| #33 MeSH descriptor Arrhythmias, Cardiac, this term only                                                    | 1604 |
| #34 MeSH descriptor Heart Failure, this term only                                                           | 4620 |
| #35 MeSH descriptor Ventricular Dysfunction, Left, this term only                                           | 1412 |
| #36 (Bundle Branch Block):ti,ab,kw in Clinical Trials                                                       | 178  |
| #37 (arrhythmi*):ti,ab,kw in Clinical Trials                                                                | 5106 |
| #38 (cardiac arrest):ti,ab,kw in Clinical Trials                                                            | 990  |
| #39 MeSH descriptor Heart Arrest, this term only                                                            | 533  |
| #40 MeSH descriptor Death, Sudden, Cardiac explode all trees                                                | 452  |
| #41 MeSH descriptor Bundle-Branch Block explode all trees                                                   | 79   |
| #42 MeSH descriptor Ventricular Fibrillation explode all trees                                              | 425  |

|     |                                                                 |       |
|-----|-----------------------------------------------------------------|-------|
| #43 | MeSH descriptor Myocardial Infarction explode all trees         | 7646  |
|     | (#22 OR #23 OR #24 OR #25 OR #26 OR #27 OR #28 OR #29 OR #30 OR |       |
| #44 | #31 OR #32 OR #33 OR #34 OR #35 OR #36 OR #37 OR #38 OR #39 OR  | 23964 |
|     | #40 OR #41 OR #42 OR #43)                                       |       |
| #45 | (#21 AND #44), from 1990 to 2011                                | 1418  |
| #46 | (#45)                                                           | 1207  |



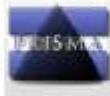

## PRISMA 2009 Flow Diagram

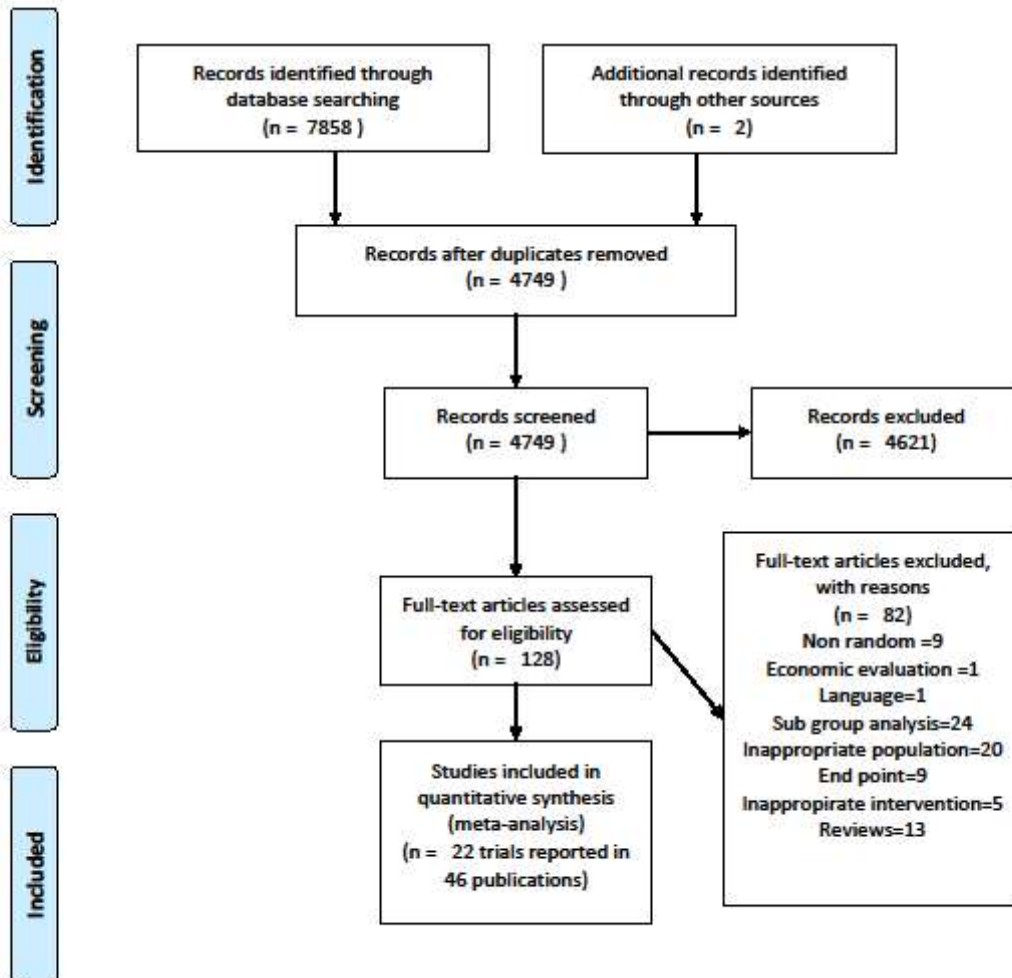

From: Moher D, Liberati A, Tetzlaff J, Altman DG, The PRISMA Group (2009). Preferred Reporting Items for Systematic Reviews and Meta-Analyses: The PRISMA Statement. PLoS Med 6(6): e1000097. doi:10.1371/journal.pmed1000097

For more information, visit [www.prisma-statement.org](http://www.prisma-statement.org).

## References

1. National Institute for Health and Care Excellence. Specification for manufacturer/sponsor submission of evidence, 2009.
2. Kleinbaum DK, Mitchel. *Survival analysis: a self-learning text*: Springer, 2005.
3. Brooks SP, Gelman A. General methods for monitoring convergence of iterative simulations. *Journal of computational and graphical statistics* 1998;**7**(4):434-55
4. Spiegelhalter DJ, Best NG, Carlin BP, Van Der Linde A. Bayesian measures of model complexity and fit. *Journal of the Royal Statistical Society: Series B (Statistical Methodology)* 2002;**64**(4):583-639
5. Higgins J. Green S. *Cochrane handbook for systematic reviews of interventions*. Version 5.1. 0. The Cochrane Collaboration; 2011, 2013.
6. Grambsch PM, Therneau TM. Proportional hazards tests and diagnostics based on weighted residuals. *Biometrika* 1994;**81**(3):515-26
7. Strickberger SA, Hummel JD, Bartlett TG, et al. Amiodarone versus implantable cardioverter-defibrillator: Randomized trial in patients with nonischemic dilated cardiomyopathy and asymptomatic nonsustained ventricular tachycardia - AMIOVIRT. *Journal of the American College of Cardiology* 2003;**41**(10):1707-12
8. Wijetunga M, Strickberger SA, Trial AVIDR. Amiodarone versus Implantable Defibrillator (AMIOVIRT): background, rationale, design, methods, results and implications. *Cardiac Electrophysiology Review* 2003;**7**(4):452-56
9. Cleland JG, Daubert JC, Erdmann E, et al. Baseline characteristics of patients recruited into the CARE-HF study. *European Journal of Heart Failure* 2005;**7**(2):205-14
10. Cleland JG, Daubert JC, Erdmann E, et al. The effect of cardiac resynchronization on morbidity and mortality in heart failure. *N.Engl.J.Med.* 2005;**352**(15):1539-49 doi: NEJMoa050496 [pii];10.1056/NEJMoa050496 [doi][published Online First: Epub Date].
11. Cleland JG, Calvert MJ, Verboven Y, Freemantle N. Effects of cardiac resynchronization therapy on long-term quality of life: an analysis from the CArdiac Resynchronisation-Heart Failure (CARE-HF) study. *American heart journal* 2009;**157**:457-66

12. Cleland JG, Daubert JC, Erdmann E, et al. Longer-term effects of cardiac resynchronization therapy on mortality in heart failure [the CARDiac REsynchronization-Heart Failure (CARE-HF) trial extension phase]. *European Heart Journal* 2006;**27**(16):1928-32
13. Cleland JG, Daubert JC, Erdmann E, et al. The CARE-HF study (CARDiac REsynchronisation in Heart Failure study): rationale, design and end-points. *European Journal of Heart Failure* 2001;**3**(4):481-89
14. Cardiomyopathy trial. The Cardiomyopathy Trial Investigators. *Pacing and clinical electrophysiology*.: *PACE* 1993;**16**:576-81
15. THE GERMAN DILATED CARDIOMYOPATHY STUDY INVESTIGATORS. Prospective studies assessing prophylactic therapy in high risk patients: the German Dilated CardioMyopathy Study (GDCMS)--study design. *Pacing Clin. Electrophysiol.* 1992;**15**(4 Pt 3):697-700
16. Bansch D, Antz M, Boczor S, et al. Primary prevention of sudden cardiac death in idiopathic dilated cardiomyopathy: the Cardiomyopathy Trial (CAT). *Circulation* 2002;**105**(12):1453-58
17. Anand IS, Carson P, Galle E, et al. Cardiac resynchronization therapy reduces the risk of hospitalizations in patients with advanced heart failure: results from the Comparison of Medical Therapy, Pacing and Defibrillation in Heart Failure (COMPANION) trial. *Circulation* 2009;**119**(7):969-77 doi: CIRCULATIONAHA.108.793273 [pii];10.1161/CIRCULATIONAHA.108.793273 [doi][published Online First: Epub Date].
18. Bristow MR, Feldman AM, Saxon LA. Heart failure management using implantable devices for ventricular resynchronization: Comparison of Medical Therapy, Pacing, and Defibrillation in Chronic Heart Failure (COMPANION) trial. *Journal of Cardiac Failure* 2000;**6**(3):276-85
19. Bristow MR, Saxon LA, Boehmer J, et al. Cardiac-resynchronization therapy with or without an implantable defibrillator in advanced chronic heart failure. *New England Journal of Medicine* 2004;**350**(21):2140-50
20. Carson P, Anand I, O'Connor C, et al. Mode of death in advanced heart failure: the Comparison of Medical, Pacing, and Defibrillation Therapies in Heart Failure (COMPANION) trial.[Erratum

- appears in *J Am Coll Cardiol.* 2008 Jun 3; 51(22): 2197 Note: Ghali, Jalil [corrected to Ghali, Jalal]]. *Journal of the American College of Cardiology* 2005;**46**(12):2329-34
21. Higgins SL, Hummel JD, Niazi IK, et al. Cardiac Resynchronization Therapy for the Treatment of Heart Failure in Patients with Intraventricular Conduction Delay and Malignant Ventricular Tachyarrhythmias. *Journal of the American College of Cardiology* 2003;**42**(8):1454-59
  22. Saxon LA, Boehmer JP, Hummel J, et al. Biventricular pacing in patients with congestive heart failure: Two prospective randomized trials. *American Journal of Cardiology* 1999;**83**(5 B):120D-23D
  23. Kadish A, Dyer A, Daubert JP, et al. Prophylactic defibrillator implantation in patients with nonischemic dilated cardiomyopathy. *New England Journal of Medicine* 2004;**350**(21):2151-58
  24. Passman R, Subacius H, Ruo B, et al. Implantable cardioverter defibrillators and quality of life: results from the defibrillators in nonischemic cardiomyopathy treatment evaluation study. *Arch.Intern.Med.* 2007;**167**(20):2226-32 doi: 167/20/2226 [pii];10.1001/archinte.167.20.2226 [doi][published Online First: Epub Date]].
  25. Moss AJ, Jackson HW, Cannom DS, et al. Improved survival with an implanted defibrillator in patients with coronary disease at high risk for ventricular arrhythmia. *New England Journal of Medicine* 1996;**335**(26):1933-40
  26. Moss AA, T; Cannom, DS; Fogoros, RN; Gallagher, J; Griffin JC et al. . Multicenter Automatic Defibrillator Implantation Trial (MADIT): Design and Clinical Protocol. *Pacing and Clinical Electrophysiology* 1991;**14**(5):920-27 doi: 10.1111/j.1540-8159.1991.tb04136.x[published Online First: Epub Date]].
  27. Moss AJ, Cannom DS, Daubert JP, et al. Multicenter automatic defibrillator implantation trial II (MADIT II): Design and clinical protocol. *Annals of Noninvasive Electrocardiology* 1999;**4**(1):83-91
  28. Moss AJ, Zareba W, Hall WJ, et al. Prophylactic implantation of a defibrillator in patients with myocardial infarction and reduced ejection fraction. *New England Journal of Medicine* 2002;**346**(12):877-83

29. Moss AJ, Hall WJ, Cannom DS, et al. Cardiac-resynchronization therapy for the prevention of heart-failure events. *New England Journal of Medicine* 2009;**361**(14):1329-38
30. Solomon SD, Foster E, Bourgoun M, et al. Effect of cardiac resynchronization therapy on reverse remodeling and relation to outcome: multicenter automatic defibrillator implantation trial: cardiac resynchronization therapy. *Circulation* 2010;**122**:985-92
31. Moss AJ, Brown MW, Cannom DS, et al. Multicenter automatic defibrillator implantation trial-cardiac resynchronization therapy (MADIT-CRT): design and clinical protocol. *Ann.Noninvasive.Electrocardiol.* 2005;**10**(4 Suppl):34-43 doi: ANEC0073 [pii];10.1111/j.1542-474X.2005.00073.x [doi][published Online First: Epub Date]].
32. Abraham WT, Fisher WG, Smith AL, et al. Cardiac resynchronization in chronic heart failure. *New England Journal of Medicine* 2002;**346**(24):1845-53
33. Abraham WT. Rationale and design of a randomized clinical trial to assess the safety and efficacy of cardiac resynchronization therapy in patients with advanced heart failure: the Multicenter InSync Randomized Clinical Evaluation (MIRACLE). *Journal of Cardiac Failure* 2000;**6**(4):369-80
34. John Sutton MG, Plappert T, Abraham WT, et al. Effect of cardiac resynchronization therapy on left ventricular size and function in chronic heart failure. *Circulation* 2003;**107**(15):1985-90
35. Young JB, Abraham WT, Smith AL, et al. Combined cardiac resynchronization and implantable cardioversion defibrillation in advanced chronic heart failure: the MIRACLE ICD Trial. *JAMA : the journal of the American Medical Association* 2003;**289**(20):2685-94 doi: 10.1001/jama.289.20.2685[published Online First: Epub Date]].
36. Abraham WT, Young JB, Leon AR, et al. Effects of cardiac resynchronization on disease progression in patients with left ventricular systolic dysfunction, an indication for an implantable cardioverter-defibrillator, and mildly symptomatic chronic heart failure. *Circulation* 2004;**110**(18):2864-8 doi: 10.1161/01.CIR.0000146336.92331.D1[published Online First: Epub Date]].

37. Cazeau S, Leclercq C, Lavergne T, et al. Effects of multisite biventricular pacing in patients with heart failure and intraventricular conduction delay. *The New England journal of medicine* 2001;**344**:873-80
38. Piccirillo G, Magri D, di CS, et al. Influence of cardiac-resynchronization therapy on heart rate and blood pressure variability: 1-year follow-up. *European Journal of Heart Failure* 2006;**8**(7):716-22
39. Pinter A, Mangat I, Korley V, et al. Assessment of resynchronization therapy on functional status and quality of life in patients requiring an implantable defibrillator. *Pacing and clinical electrophysiology. : PACE* 2009;**32**:1509-19
40. Tang AS, Wells GA, Talajic M, et al. Cardiac-resynchronization therapy for mild-to-moderate heart failure. *New England Journal of Medicine* 2010;**363**(25):2385-95
41. Tang AS, Wells GA, Arnold M, et al. Resynchronization/defibrillation for ambulatory heart failure trial: Rationale and trial design. *Current Opinion in Cardiology* 2009;**24**(1):1-8
42. Foley PW, Patel K, Irwin N, et al. Cardiac resynchronisation therapy in patients with heart failure and a normal QRS duration: the RESPOND study. *Heart* 2011;**97**(13):1041-47
43. Beshai JF, Grimm R. The resynchronization therapy in narrow QRS study (RethinQ study): methods and protocol design. *Journal of interventional cardiac electrophysiology. : an international journal of arrhythmias and pacing* 2007;**19**:149-55
44. Beshai JF, Grimm RA, Nagueh SF, et al. Cardiac-resynchronization therapy in heart failure with narrow QRS complexes. *New England Journal of Medicine* 2007;**357**(24):2461-71
45. St-John Sutton M, Ghio S, Plappert T, et al. Cardiac resynchronization induces major structural and functional reverse remodeling in patients with New York Heart Association class I/II heart failure. *Circulation* 2009;**120**:1858-65
46. Linde C, Abraham WT, Gold MR, et al. Randomized trial of cardiac resynchronization in mildly symptomatic heart failure patients and in asymptomatic patients with left ventricular dysfunction and previous heart failure symptoms. *J Am Coll Cardiol* 2008;**52**(23):1834-43  
doi: 10.1016/j.jacc.2008.08.027[published Online First: Epub Date].

47. Linde C, Gold M, Abraham WT, Daubert J-C. Rationale and design of a randomized controlled trial to assess the safety and efficacy of cardiac resynchronization therapy in patients with asymptomatic left ventricular dysfunction with previous symptoms or mild heart failure - The REsynchronization reVERses Remodeling in Systolic left vEntricular dysfunction (REVERSE) study. *American Heart Journal* 2006;**151**(2):288-94
48. Linde C, Gold M, Abraham WT, Daubert JC, -REVERSE-Study-Group. Baseline characteristics of patients randomized in The Resynchronization Reverses Remodeling In Systolic Left Ventricular Dysfunction (REVERSE) study. *Congestive.heart failure*. 2008;**14**:66-74
49. RHYTHM ICD. St. Jude Medical® Epic™ HF System including the Epic™ HF Model V-338 Cardiac Resynchronization Therapy Defibrillator, the Aescula™ LV Model 1055K Lead, the QuickSite™ LV Model 1056K Lead, and the Model 3307 v4.5m Programmer Software - P030054. US Food and Drug Administration 2004
50. Bardy GH, Lee KL, Mark DB, et al. Amiodarone or an implantable cardioverter-defibrillator for congestive heart failure.[Erratum appears in *N Engl J Med*. 2005 May 19;352(20):2146]. *New England Journal of Medicine* 2005;**352**(3):225-37
51. Packer DL, Prutkin JM, Hellkamp AS, et al. Impact of implantable cardioverter-defibrillator, amiodarone, and placebo on the mode of death in stable patients with heart failure: analysis from the sudden cardiac death in heart failure trial.[Erratum appears in *Circulation*. 2010 Feb 16;121(6):e39]. *Circulation* 2009;**120**(22):2170-76
52. VECTOR. St. Jude Medical Frontier™ Model 5508L and Frontier™ II Model 5586 Cardiac Resynchronization Therapy Pacemakers (CRT-P) supported on the Model 3510 programmer platforms with the Model 3307, v4.8m programmer software - P030035/S003. US Food and Drug Administration 2005
